# Supplementary material for: Size-controlled monodispersed nickel nanocrystals using 2-octanol as reducing agent
Source: Royal Society of Chemistry journal article supplement (doi:10.1039/c2ce26433a), 2012-11-07
Supplement: c2ce26433a.pdf [file c2ce26433a.pdf]

## Electronic Supplementary Information (ESI)

# Size-Controlled Monodispersed Nickel Nanocrystals Using 2-octanol as Reducing Agent

**Jhon L. Cuya Huaman,<sup>a</sup> Nobuyoshi Hironaka,<sup>a</sup> Shinya Tanaka,<sup>a</sup> Kozo Shinoda,<sup>b</sup> Hiroshi Miyamura,<sup>a</sup> and Balachandran Jeyadevan<sup>\*a</sup>**

<sup>a</sup> *Department of Materials Science, School of Engineering, The University of Shiga Prefecture, Hikone, Japan.*

<sup>b</sup> *Institute of Multidisciplinary Research for Advanced Materials, Tohoku University, Sendai, Japan.*

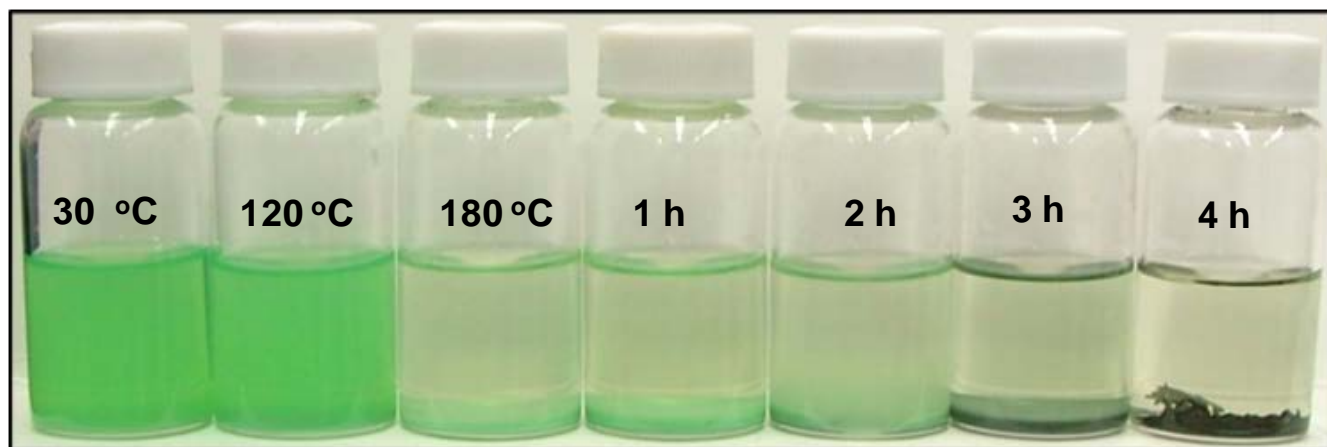

**Figure S1.** Colors that the solutions take during the reduction of nickel acetate could be related with the formation of layered hydroxide and metallic nickel.

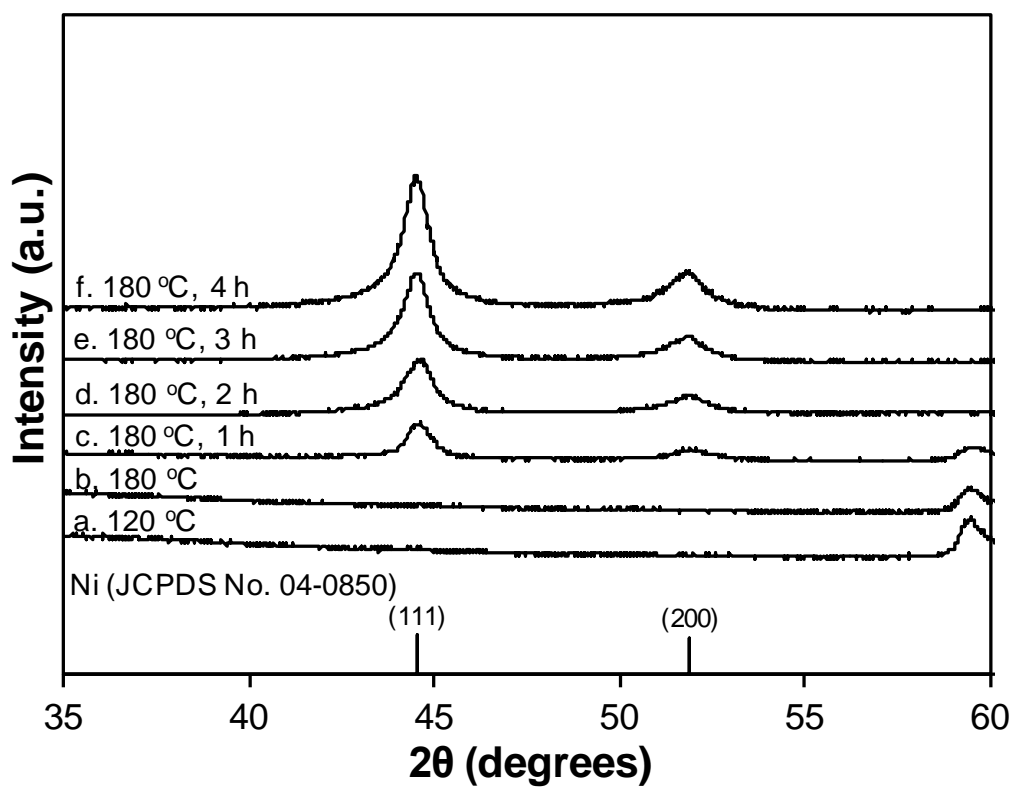

**Figure SII.** XRD patterns of nickel powders synthesized with 2-octanol and 0.4 M oleylamine at different reaction temperatures and durations.

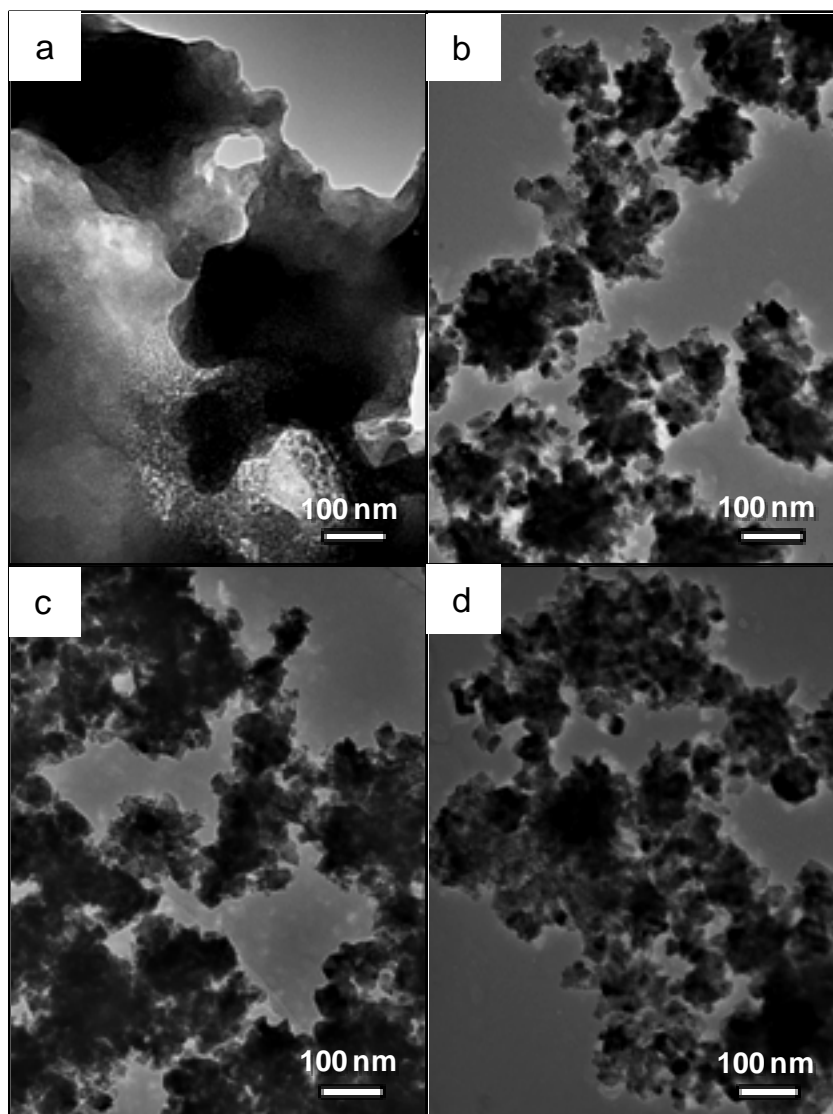

**Figure SIII.** TEM images of nickel nanoparticles obtained by adding 0.2 M NaOH to 2-octanol. a) 120 °C, b) 180 °C, c) 180 °C for 1 h, and d) 180 °C for 4 h.
